# Supplementary material for: Pioglitazone, Vitamin E, or Placebo for Nonalcoholic Steatohepatitis
Source: Atypon-hosted journal article supplement (doi:10.1056/nejmoa0907929), 2010-04-28
Supplement: nejm_sanyal_1675sa1.pdf [file nejm_sanyal_1675sa1.pdf]

## Supplementary Appendix

This appendix has been provided by the authors to give readers additional information about their work.

Supplement to: Sanyal AJ, Chalasani N, Kowdley KV, et al. Pioglitazone, vitamin E, or placebo for nonalcoholic steatohepatitis. *N Engl J Med* 2010;362:1675-85. DOI: 10.1056/NEJMoa0907929.

**Supplement Figure 1:**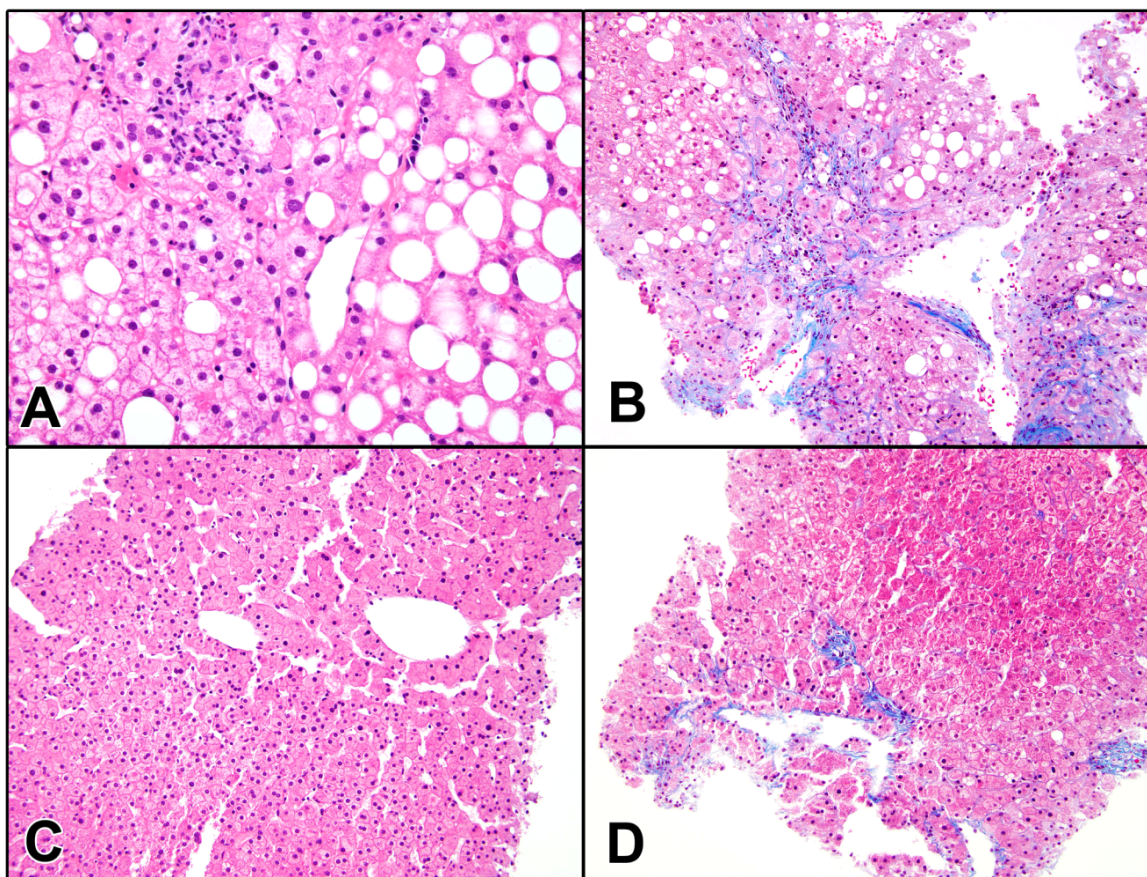

Photomicrographs of a patient with marked histological improvement after 96 weeks of treatment. Panels A ( H&E, 400x) and B (Masson trichrome, 200x) from the pre-treatment biopsy show the classic features of steatohepatitis: moderate steatosis, prominent ballooning injury, spotty lobular inflammation, and central perisinusoidal fibrosis. Panels C ( H&E, 400x) and D (Masson trichrome, 200x) from the post-treatment biopsy show improvement in all features of steatohepatitis: no ballooning injury, minimal steatosis, and rare foci of spotty inflammation with only mild residual perisinusoidal fibrosis remaining.

Supplement Table 1. Baseline characteristics by treatment group

|                                            | Placebo<br>(n=83) | Vitamin     |                        | Total<br>(n=247) | P*                          |                                |                                  |
|--------------------------------------------|-------------------|-------------|------------------------|------------------|-----------------------------|--------------------------------|----------------------------------|
|                                            |                   | E<br>(n=84) | Pioglitazone<br>(n=80) |                  | Vitamin E<br>vs.<br>Placebo | Pioglitazone<br>vs.<br>Placebo | Vitamin E<br>vs.<br>Pioglitazone |
| <b>Demographics</b>                        |                   |             |                        |                  |                             |                                |                                  |
| Age (yrs) - mean±SD                        | 45.4              | 46.6        | 47.0                   | 46.3±11.9        | 0.59                        | 0.43                           | 0.83                             |
| Female (%)                                 | 57.8              | 61.9        | 58.8                   | 59.5             | 0.59                        | 0.91                           | 0.68                             |
| Hispanic (%)                               | 7.2               | 19.0        | 18.8                   | 15.0             | 0.02                        | 0.03                           | 0.96                             |
| Non-white (%)                              | 11.0              | 15.2        | 8.1                    | 11.5             | 0.43                        | 0.54                           | 0.17                             |
| <b>Quality of life† - mean±SD</b>          |                   |             |                        |                  |                             |                                |                                  |
| SF-36 Physical component                   |                   |             |                        |                  |                             |                                |                                  |
| Physical function                          | 46                | 47          | 49                     | 47±10            | 0.51                        | 0.15                           | 0.42                             |
| Role physical                              | 46                | 48          | 49                     | 48±11            | 0.26                        | 0.08                           | 0.49                             |
| Bodily pain                                | 48                | 50          | 50                     | 50±10            | 0.25                        | 0.39                           | 0.74                             |
| General health                             | 42                | 44          | 43                     | 43±10            | 0.26                        | 0.32                           | 0.90                             |
| Physical component summary                 | 47                | 49          | 49                     | 48±10            | 0.35                        | 0.41                           | 0.89                             |
| SF-36 Mental component                     |                   |             |                        |                  |                             |                                |                                  |
| Vitality                                   | 42                | 45          | 45                     | 44±11            | 0.13                        | 0.16                           | 0.93                             |
| Social function                            | 47                | 50          | 49                     | 49±10            | 0.24                        | 0.41                           | 0.73                             |
| Role emotional                             | 47                | 49          | 51                     | 49±11            | 0.34                        | 0.02                           | 0.20                             |
| Mental health                              | 48                | 50          | 50                     | 49±10            | 0.20                        | 0.16                           | 0.92                             |
| Mental component summary                   | 47                | 49          | 49                     | 48±10            | 0.10                        | 0.10                           | 0.96                             |
| <b>Serum biochemistry tests - mean±SD</b>  |                   |             |                        |                  |                             |                                |                                  |
| AST (U/L)                                  | 55                | 59          | 54                     | 56±30            | 0.47                        | 0.83                           | 0.33                             |
| ALT (U/L)                                  | 81                | 86          | 82                     | 83±49            | 0.51                        | 0.90                           | 0.58                             |
| GGT (U/L)                                  | 69                | 56          | 60                     | 61±63            | 0.60                        | 0.78                           | 0.79                             |
| Alkaline phosphatase (U/L)                 | 82                | 77          | 86                     | 81±30            | 0.20                        | 0.43                           | 0.08                             |
| Bilirubin - direct (mg/dL)                 | 0.14              | 0.13        | 0.16                   | 0.15±0.12        | 0.99                        | 0.57                           | 0.59                             |
| Bilirubin - total (mg/dL)                  | 0.76              | 0.75        | 0.77                   | 0.76±0.35        | 0.48                        | 0.86                           | 0.61                             |
| <b>Lipids - mean±SD</b>                    |                   |             |                        |                  |                             |                                |                                  |
| Triglycerides (mg/dL)                      | 165               | 166         | 162                    | 165±93           | 0.94                        | 0.94                           | 0.88                             |
| Total cholesterol (mg/dL)                  | 199               | 195         | 195                    | 196±39           | 0.62                        | 0.49                           | 0.84                             |
| High density lipoprotein (mg/dL)           | 43                | 44          | 45                     | 44±12            | 0.98                        | 0.73                           | 0.75                             |
| Low density lipoprotein (mg/dL)            | 125               | 119         | 120                    | 122±34           | 0.27                        | 0.25                           | 0.99                             |
| <b>Metabolic characteristics - mean±SD</b> |                   |             |                        |                  |                             |                                |                                  |
| HOMA-IR (mg/dL x μU/mL/405)                | 5.5               | 5.2         | 5.0                    | 5.2±4.3          | 0.78                        | 0.47                           | 0.68                             |
| Fasting serum glucose (mg/dL)              | 95                | 95          | 92                     | 94±13            | 0.79                        | 0.16                           | 0.10                             |
| Fasting serum insulin (μU/mL)              | 23                | 22          | 21                     | 22±18            | 0.68                        | 0.76                           | 0.91                             |
| Weight (kg)                                | 99                | 94          | 97                     | 97±23            | 0.13                        | 0.49                           | 0.42                             |
| Body mass index (kg/m <sup>2</sup> )       | 35                | 34          | 34                     | 34±7             | 0.28                        | 0.65                           | 0.51                             |
| Waist circumference (cm)                   | 109               | 107         | 108                    | 108±14           | 0.35                        | 0.60                           | 0.69                             |
| Waist to hip ratio                         | 0.93              | 0.93        | 0.94                   | 0.93±0.08        | 0.81                        | 0.65                           | 0.82                             |
| Triceps skinfold (mm)                      | 34                | 32          | 34                     | 33±13            | 0.09                        | 0.95                           | 0.10                             |
| Mid-upper arm circumference (cm)           | 36                | 35          | 36                     | 36±5             | 0.29                        | 0.72                           | 0.45                             |
| Trunk (% fat)‡                             | 42                | 42          | 43                     | 42±8             | 0.57                        | 0.95                           | 0.52                             |
| Total (% fat)‡                             | 40                | 39          | 40                     | 39±9             | 0.69                        | 0.90                           | 0.58                             |

Supplement Table 1. Baseline characteristics by treatment group

|                                           | Placebo<br>(n=83) | Vitamin     |                        | Total<br>(n=247) | P*                          |                                |                                  |
|-------------------------------------------|-------------------|-------------|------------------------|------------------|-----------------------------|--------------------------------|----------------------------------|
|                                           |                   | E<br>(n=84) | Pioglitazone<br>(n=80) |                  | Vitamin E<br>vs.<br>Placebo | Pioglitazone<br>vs.<br>Placebo | Vitamin E<br>vs.<br>Pioglitazone |
| <b>Liver Histology</b>                    |                   |             |                        |                  |                             |                                |                                  |
| Fibrosis (%)                              |                   |             |                        |                  |                             |                                |                                  |
| None                                      | 19.3              | 16.9        | 13.8                   | 16.7             | 0.67                        | 0.40                           | 0.63                             |
| Mild, zone 3 perisinusoidal               | 16.9              | 27.4        | 25.0                   | 23.1             |                             |                                |                                  |
| Moderate, zone 3 perisinusoidal           | 12.0              | 10.7        | 18.8                   | 13.8             |                             |                                |                                  |
| Portal/periportal only                    | 1.2               | 1.2         | 3.8                    | 2.0              |                             |                                |                                  |
| Zone 3 and periportal                     | 27.7              | 21.7        | 23.8                   | 24.4             |                             |                                |                                  |
| Bridging                                  | 19.3              | 20.5        | 13.8                   | 17.9             |                             |                                |                                  |
| Cirrhosis                                 | 3.6               | 1.2         | 1.2                    | 2.0              |                             |                                |                                  |
| Grade - mean±SD                           | 1.6               | 1.5         | 1.4                    | 1.5±1.0          |                             |                                |                                  |
| Diagnosis of steatohepatitis (%)          |                   |             |                        |                  |                             |                                |                                  |
| No                                        | 10.8              | 8.4         | 12.5                   | 10.5             | 0.49                        | 0.59                           | 0.07                             |
| Borderline, zone 3 pattern                | 16.9              | 9.6         | 22.5                   | 16.2             |                             |                                |                                  |
| Borderline, zone 1 pattern                | 1.2               | 1.2         | 0.0                    | 0.8              |                             |                                |                                  |
| Definite                                  | 71.1              | 80.7        | 65.0                   | 72.5             |                             |                                |                                  |
| Steatosis (%)                             |                   |             |                        |                  |                             |                                |                                  |
| < 5%                                      | 2.4               | 2.4         | 1.2                    | 2.0              | 0.65                        | 0.65                           | 0.85                             |
| 5 - 33%                                   | 31.3              | 33.3        | 28.8                   | 31.2             |                             |                                |                                  |
| 34 - 66%                                  | 42.2              | 33.3        | 37.5                   | 37.6             |                             |                                |                                  |
| > 66%                                     | 24.1              | 31.0        | 32.5                   | 29.2             |                             |                                |                                  |
| Grade - mean±SD                           | 1.9               | 1.9         | 2.0                    | 1.9±0.8          |                             |                                |                                  |
| Amount (foci) of lobular inflammation (%) |                   |             |                        |                  |                             |                                |                                  |
| 0                                         | 0.0               | 0.0         | 0.0                    | 0.0              | 0.24                        | 0.12                           | 0.36                             |
| > 0 and < 2                               | 48.2              | 38.1        | 32.5                   | 39.7             |                             |                                |                                  |
| 2-4                                       | 41.0              | 42.9        | 53.8                   | 45.8             |                             |                                |                                  |
| > 4                                       | 10.8              | 19.0        | 13.8                   | 14.6             |                             |                                |                                  |
| Grade - mean±SD                           | 1.6               | 1.8         | 1.8                    | 1.7±0.7          |                             |                                |                                  |
| Portal, chronic inflammation (%)          |                   |             |                        |                  |                             |                                |                                  |
| None                                      | 20.5              | 15.7        | 17.5                   | 17.8             | 0.71                        | 0.89                           | 0.93                             |
| Mild                                      | 61.4              | 63.9        | 63.8                   | 63.2             |                             |                                |                                  |
| More than mild                            | 18.1              | 20.5        | 18.8                   | 19.0             |                             |                                |                                  |
| Ballooning degeneration (%)               |                   |             |                        |                  |                             |                                |                                  |
| None                                      | 16.9              | 17.9        | 27.5                   | 20.6             | 0.78                        | 0.26                           | 0.24                             |
| Few                                       | 36.1              | 31.0        | 32.5                   | 33.2             |                             |                                |                                  |
| Many                                      | 47.0              | 51.2        | 40.0                   | 46.2             |                             |                                |                                  |
| Grade - mean±SD                           | 1.3               | 1.3         | 1.1                    | 1.2±0.8          |                             |                                |                                  |

Supplement Table 1. Baseline characteristics by treatment group

|                                              | Placebo<br>(n=83) | Vitamin     |                        | Total<br>(n=247) | P*                          |                                |                                  |
|----------------------------------------------|-------------------|-------------|------------------------|------------------|-----------------------------|--------------------------------|----------------------------------|
|                                              |                   | E<br>(n=84) | Pioglitazone<br>(n=80) |                  | Vitamin E<br>vs.<br>Placebo | Pioglitazone<br>vs.<br>Placebo | Vitamin E<br>vs.<br>Pioglitazone |
| Total NAFLD Activity Score (%)               |                   |             |                        |                  |                             |                                |                                  |
| 2                                            | 1.2               | 6.0         | 3.8                    | 3.6              | 0.17                        | 0.32                           | 0.45                             |
| 3                                            | 18.1              | 6.0         | 13.8                   | 12.6             |                             |                                |                                  |
| 4                                            | 27.7              | 23.8        | 17.5                   | 23.1             |                             |                                |                                  |
| 5                                            | 19.3              | 23.8        | 32.5                   | 25.1             |                             |                                |                                  |
| 6                                            | 20.5              | 22.6        | 16.2                   | 19.8             |                             |                                |                                  |
| 7                                            | 12.0              | 15.5        | 13.8                   | 13.8             |                             |                                |                                  |
| 8                                            | 1.2               | 2.4         | 2.5                    | 2.0              |                             |                                |                                  |
| Grade - mean±SD                              | 4.8               | 5.1         | 5.0                    | 4.9±1.4          | 0.17                        | 0.46                           | 0.55                             |
| Biopsy length                                |                   |             |                        |                  |                             |                                |                                  |
| (mm) - mean±SD                               | 18.6              | 21.4        | 19.6                   | 19.8±9.3         | 0.05                        | 0.45                           | 0.25                             |
| % < 10 mm                                    | 6.0               | 12.0        | 12.7                   | 10.2             | 0.18                        | 0.15                           | 0.91                             |
| <b>Iron status - mean±SD</b>                 |                   |             |                        |                  |                             |                                |                                  |
| Serum iron (µg/dL)                           | 89                | 90          | 103                    | 94±36            | 0.87                        | 0.03                           | 0.03                             |
| Serum total iron binding<br>capacity (µg/dL) | 359               | 360         | 356                    | 358±70           | 0.94                        | 0.83                           | 0.78                             |
| Serum ferritin (ng/mL)                       | 304               | 223         | 280                    | 269±313          | 0.10                        | 0.66                           | 0.17                             |
| <b>Dietary supplements (%)</b>               |                   |             |                        |                  |                             |                                |                                  |
| Milk thistle                                 | 4.8               | 6.0         | 1.2                    | 4.0              | 0.75                        | 0.19                           | 0.11                             |
| Green tea or green tea extract               | 1.2               | 0.0         | 0.0                    | 0.4              | 0.31                        | 0.32                           | --                               |
| Selenium                                     | 1.2               | 0.0         | 0.0                    | 0.4              | 0.31                        | 0.32                           | --                               |
| Vitamin A                                    | 2.4               | 1.2         | 0.0                    | 1.2              | 0.55                        | 0.16                           | 0.33                             |
| Vitamin C                                    | 12.0              | 13.1        | 10.0                   | 11.7             | 0.84                        | 0.68                           | 0.54                             |
| Vitamin D                                    | 3.6               | 7.1         | 10.0                   | 6.9              | 0.31                        | 0.10                           | 0.51                             |

\*Based on chi-square test for categorical variables or t-test on rank of outcome for continuous variables

†SF-36 standardized to 1998 U.S. general population with mean=50 and SD =10

‡Missing values (4 Placebo, 5 Vitamin E, 6 Pioglitazone) due to patient being heavier than allowed weight were imputed with the 95<sup>th</sup> percentile

Supplement Table 2. Selected characteristics at week 96 by treatment group

|                                | Placebo | Vitamin E |              | Total    | P*                    |                          |                            |
|--------------------------------|---------|-----------|--------------|----------|-----------------------|--------------------------|----------------------------|
|                                |         | Placebo   | Pioglitazone |          | Vitamin E vs. Placebo | Pioglitazone vs. Placebo | Vitamin E vs. Pioglitazone |
| <b>Dietary supplements (%)</b> |         |           |              |          |                       |                          |                            |
| n                              | 74      | 79        | 70           | 223      |                       |                          |                            |
| Milk thistle                   | 0.0     | 0.0       | 0.0          | 0.0      | --                    | --                       | --                         |
| Green tea or green tea extract | 2.7     | 0.0       | 0.0          | 0.9      | 0.14                  | 0.17                     | --                         |
| Selenium                       | 0.0     | 0.0       | 1.4          | 0.4      | --                    | 0.30                     | 0.29                       |
| Vitamin A                      | 1.4     | 0.0       | 0.0          | 0.4      | 0.30                  | 0.33                     | --                         |
| Vitamin C                      | 4.0     | 10.1      | 5.7          | 6.7      | 0.15                  | 0.64                     | 0.32                       |
| Vitamin D                      | 8.1     | 10.1      | 8.6          | 9.0      | 0.67                  | 0.92                     | 0.75                       |
| <b>Liver histology</b>         |         |           |              |          |                       |                          |                            |
| Biopsy length                  |         |           |              |          |                       |                          |                            |
| n                              | 72      | 80        | 70           | 222      |                       |                          |                            |
| (mm) - mean±SD                 | 18.6    | 17.1      | 18.6         | 18.1±9.4 | 0.24                  | 0.99                     | 0.32                       |
| % < 10 mm                      | 9.7     | 8.8       | 12.9         | 10.4     | 0.84                  | 0.55                     | 0.42                       |

\*Based on chi-square test for categorical variables or t-test on for continuous variables

Supplement Table 3. Clinic events, outcomes and adverse events by treatment group

|                                                         | Placebo<br>(n=83) | Vitamin E<br>(n=84) | Pioglitazone<br>(n=80) | P                           |                                |
|---------------------------------------------------------|-------------------|---------------------|------------------------|-----------------------------|--------------------------------|
|                                                         |                   |                     |                        | Vitamin E<br>vs.<br>Placebo | Pioglitazone<br>vs.<br>Placebo |
| <b>Clinical events / outcomes</b>                       |                   |                     |                        |                             |                                |
| Hypoglycemia                                            | 8                 | 8                   | 15                     | 1.00                        | 0.11                           |
| New-onset diabetes                                      | 0                 | 4                   | 0                      | 0.12                        | -.-                            |
| Cardiovascular event                                    | 12                | 12                  | 10                     | 1.00                        | 0.82                           |
| Bone fracture                                           | 5                 | 3                   | 3                      | 0.50                        | 0.50                           |
| Weight gain > 20% from baseline                         | 0                 | 0                   | 3                      | -.-                         | 0.12                           |
| Bone mineral density loss<br>≥ 1 t-score from baseline* | 0                 | 0                   | 1                      | -.-                         | 0.47                           |
| <b>Hepatotoxicity</b>                                   |                   |                     |                        |                             |                                |
| ALT > 250 U/L                                           | 1                 | 4                   | 0                      | 0.37                        | 1.00                           |
| ALT > 500 U/L                                           | 0                 | 0                   | 0                      | -.-                         | -.-                            |
| AST > 250 U/L                                           | 3                 | 1                   | 1                      | 0.37                        | 0.62                           |
| GGT > 250 U/L                                           | 2                 | 1                   | 1                      | 0.62                        | 1.00                           |
| Bilirubin > 3 mg/dL                                     | 0                 | 1                   | 2                      | 1.00                        | 0.24                           |
| <b>Adverse events by severity†</b>                      |                   |                     |                        | 0.77                        | 0.51                           |
| Mild                                                    | 20                | 24                  | 25                     |                             |                                |
| Moderate                                                | 20                | 19                  | 16                     |                             |                                |
| <b>Severe</b>                                           |                   |                     |                        |                             |                                |
| Arthritis                                               | 0                 | 0                   | 1                      |                             |                                |
| Hepatotoxicity                                          | 3                 | 0                   | 0                      |                             |                                |
| Cataract                                                | 1                 | 0                   | 0                      |                             |                                |
| Fracture                                                | 2                 | 0                   | 0                      |                             |                                |
| Gastroenteritis                                         | 0                 | 1                   | 0                      |                             |                                |
| Gout                                                    | 1                 | 0                   | 0                      |                             |                                |
| Hyperglycemia                                           | 0                 | 1                   | 0                      |                             |                                |
| Infection                                               | 2                 | 0                   | 0                      |                             |                                |
| Pain                                                    | 1                 | 3                   | 0                      |                             |                                |
| Syncope                                                 | 0                 | 1                   | 0                      |                             |                                |
| Transient ischemic attack                               | 0                 | 0                   | 1                      |                             |                                |
| Urticaria                                               | 0                 | 1                   | 0                      |                             |                                |
| <b>Life-threatening or disabling</b>                    |                   |                     |                        |                             |                                |
| Cardiac ischemia/infarction                             | 0                 | 1                   | 0                      |                             |                                |
| Liver dysfunction                                       | 0                 | 1                   | 0                      |                             |                                |
| <b>Death‡</b>                                           |                   |                     |                        |                             |                                |
|                                                         | 0                 | 1                   | 0                      |                             |                                |
| Total                                                   | 50                | 53                  | 43                     |                             |                                |

\*Number of patients with DEXA scan at both week 96 and baseline are 50, 51, and 49 for placebo, vitamin E and pioglitazone groups respectively

†As reported by study physician at time of event

‡Cause of death was pneumonia and liver failure secondary to sepsis from gram-negative bacteremia

Supplement Table 4. Changes from baseline to 96 weeks in symptoms of liver disease\*

| Symptom of liver disease               | Change in degree of bother† |                     |                        | P‡                         |                               |                                 |
|----------------------------------------|-----------------------------|---------------------|------------------------|----------------------------|-------------------------------|---------------------------------|
|                                        | Placebo<br>(n=74)           | Vitamin E<br>(n=77) | Pioglitazone<br>(n=70) | Vitamin E<br>vs<br>Placebo | Pioglitazone<br>vs<br>Placebo | Vitamin E<br>vs<br>Pioglitazone |
| Pain over liver (right upper quadrant) | -0.07                       | -0.08               | -0.09                  | 0.55                       | 0.53                          | 0.97                            |
| Nausea                                 | -0.12                       | -0.10               | 0.03                   | 0.17                       | 0.79                          | 0.29                            |
| Poor appetite                          | -0.01                       | -0.05               | 0.24                   | 0.35                       | 0.51                          | 0.05                            |
| Fatigue                                | -0.03                       | -0.14               | -0.03                  | 0.37                       | 0.66                          | 0.70                            |
| Weight loss                            | 0.03                        | 0.04                | -0.11                  | 0.68                       | 0.62                          | 0.33                            |
| Diarrhea                               | -0.16                       | 0.04                | -0.03                  | 0.70                       | 0.77                          | 0.57                            |
| Muscle aches or cramps                 | 0.03                        | 0.12                | 0.27                   | 0.95                       | 0.29                          | 0.44                            |
| Muscle weakness                        | 0.00                        | 0.23                | 0.09                   | 0.56                       | 0.77                          | 0.36                            |
| Headaches                              | 0.11                        | 0.18                | 0.29                   | 0.92                       | 0.65                          | 0.78                            |
| Easy bruising                          | -0.03                       | -0.12               | 0.14                   | 0.46                       | 0.57                          | 0.24                            |
| Itching                                | -0.01                       | 0.08                | 0.21                   | 0.73                       | 0.28                          | 0.42                            |
| Irritability                           | 0.15                        | 0.08                | 0.27                   | 0.18                       | 0.42                          | 0.04                            |
| Depression / sadness                   | 0.20                        | -0.06               | 0.28                   | 0.05                       | 0.61                          | 0.02                            |
| Trouble sleeping                       | 0.24                        | 0.09                | 0.27                   | 0.17                       | 0.64                          | 0.46                            |
| Trouble concentrating                  | 0.15                        | 0.05                | 0.28                   | 0.46                       | 0.73                          | 0.27                            |
| Jaundice                               | 0.08                        | 0.01                | 0.09                   | 0.22                       | 0.95                          | 0.36                            |
| Dark urine                             | 0.05                        | -0.09               | 0.00                   | 0.19                       | 0.46                          | 0.57                            |
| Swelling of ankles                     | 0.14                        | -0.01               | 0.29                   | 0.26                       | 0.22                          | 0.01                            |
| Swelling of abdomen                    | -0.08                       | 0.01                | -0.01                  | 0.62                       | 0.74                          | 0.87                            |

\*Question on Symptoms of Liver Disease form: "During the last month, how much have you been bothered by the following"

†Degree of bother coded as 1=none at all, 2=a little bit, 3=moderately, 4=quite a bit, 5=extremely

‡Based on ANCOVA model regressing change from baseline at 96 weeks on treatment group and baseline value of the outcome

Supplement Table 5. Improvement in NASH and changes in other histologic features by treatment group

|                                                                    | Week 96 - Baseline |           |              | Total | P*                    |                          |                            |
|--------------------------------------------------------------------|--------------------|-----------|--------------|-------|-----------------------|--------------------------|----------------------------|
|                                                                    | Placebo            | Vitamin E | Pioglitazone |       | Vitamin E vs. Placebo | Pioglitazone vs. Placebo | Vitamin E vs. Pioglitazone |
| <b>Primary outcome: Histologic improvement in NASH<sup>†</sup></b> |                    |           |              |       |                       |                          |                            |
| Number randomized                                                  | 83                 | 84        | 80           | 247   |                       |                          |                            |
| Percent improved                                                   | 19                 | 43        | 34           | 32    | 0.001                 | 0.04                     | 0.20                       |
| <b>Changes in liver histology, baseline to 96 weeks</b>            |                    |           |              |       |                       |                          |                            |
| Number with two biopsies                                           | 72                 | 80        | 70           | 222   |                       |                          |                            |
| <b>Fibrosis</b>                                                    |                    |           |              |       |                       |                          |                            |
| % worse                                                            | 22                 | 19        | 17           | 19    | 0.27                  | 0.13                     | 0.64                       |
| % same                                                             | 47                 | 41        | 39           | 42    |                       |                          |                            |
| % better                                                           | 31                 | 41        | 44           | 38    |                       |                          |                            |
| Mean change                                                        | -0.1               | -0.3      | -0.4         | -0.3  | 0.19                  | 0.10                     | 0.78                       |
| <b>Steatosis</b>                                                   |                    |           |              |       |                       |                          |                            |
| % worse                                                            | 21                 | 8         | 4            | 11    | 0.001                 | <0.0001                  | 0.07                       |
| % same                                                             | 49                 | 39        | 27           | 38    |                       |                          |                            |
| % better                                                           | 31                 | 54        | 69           | 51    |                       |                          |                            |
| Mean change                                                        | -0.1               | -0.7      | -0.8         | -0.6  | <0.0001               | <0.0001                  | 0.41                       |
| <b>Lobular inflammation</b>                                        |                    |           |              |       |                       |                          |                            |
| % worse                                                            | 17                 | 8         | 6            | 10    | 0.01                  | 0.001                    | 0.43                       |
| % same                                                             | 49                 | 39        | 34           | 41    |                       |                          |                            |
| % better                                                           | 35                 | 54        | 60           | 50    |                       |                          |                            |
| Mean change                                                        | -0.2               | -0.6      | -0.7         | -0.5  | 0.008                 | 0.0009                   | 0.59                       |
| <b>Portal inflammation</b>                                         |                    |           |              |       |                       |                          |                            |
| % worse                                                            | 22                 | 19        | 13           | 18    | 0.30                  | 0.13                     | 0.66                       |
| % same                                                             | 67                 | 64        | 71           | 67    |                       |                          |                            |
| % better                                                           | 11                 | 18        | 16           | 15    |                       |                          |                            |
| <b>Ballooning degeneration</b>                                     |                    |           |              |       |                       |                          |                            |
| % worse                                                            | 21                 | 14        | 9            | 14    | 0.02                  | 0.02                     | 0.96                       |
| % same                                                             | 50                 | 36        | 47           | 44    |                       |                          |                            |
| % better                                                           | 29                 | 50        | 44           | 41    |                       |                          |                            |
| Mean change                                                        | -0.2               | -0.5      | -0.4         | -0.4  | 0.03                  | 0.01                     | 0.59                       |
| <b>Total NAFLD Activity Score</b>                                  |                    |           |              |       |                       |                          |                            |
| % worse                                                            | 31                 | 11        | 9            | 17    | 0.0007                | <0.0001                  | 0.39                       |
| % same                                                             | 19                 | 14        | 10           | 14    |                       |                          |                            |
| % better                                                           | 50                 | 75        | 81           | 69    |                       |                          |                            |
| Mean change                                                        | -0.5               | -1.9      | -1.9         | -1.5  | <0.0001               | <0.0001                  | 0.27                       |
| <b>Diagnosis of NASH</b>                                           |                    |           |              |       |                       |                          |                            |
| % worse                                                            | 12                 | 4         | 7            | 8     | 0.0008                | 0.01                     | 0.55                       |
| % same                                                             | 60                 | 44        | 43           | 49    |                       |                          |                            |
| % better                                                           | 28                 | 52        | 50           | 44    |                       |                          |                            |
| % resolved <sup>‡</sup>                                            | 21                 | 36        | 47           | 35    | 0.05                  | 0.001                    | 0.19                       |

\*P-values derived from Mantel-Haenszel chi-square test stratified by clinic for primary outcome, Cochran's chi-square test for trend for ordered outcomes, chi-square test for binary outcomes, or ANCOVA model regressing change from baseline at 96 weeks on treatment group and baseline value of the outcome for continuous outcomes

<sup>†</sup>Primary outcome is defined as 1) no worsening in fibrosis; and 2) improvement in ballooning; and either 3a) NAFLD Activity Score  $\leq$  3; or 3b) decrease in NAFLD Activity Score of at least 2 and improvement in lobular inflammation or steatosis; 11 Placebo, 4 Vitamin E, and 10 Pioglitazone assigned patients with missing histology at week 96 were imputed with no improvement.

**Supplement Table 5. Improvement in NASH and changes in other histologic features by treatment group**

| <u>Week 96 - Baseline</u> |           |              |       | <u>P*</u>                   |                                |                                  |
|---------------------------|-----------|--------------|-------|-----------------------------|--------------------------------|----------------------------------|
| Placebo                   | Vitamin E | Pioglitazone | Total | Vitamin E<br>vs.<br>Placebo | Pioglitazone<br>vs.<br>Placebo | Vitamin E<br>vs.<br>Pioglitazone |

‡ Defined as no NASH at week 96

**Supplement Table 6. Change from baseline at week 96 in serum biochemical tests, quality of life and metabolic factors by treatment group**

|                                                                    | Week 96 - Baseline |                     |                        |                  | P*                          |                                |                                  |
|--------------------------------------------------------------------|--------------------|---------------------|------------------------|------------------|-----------------------------|--------------------------------|----------------------------------|
|                                                                    | Placebo<br>(n=74)  | Vitamin E<br>(n=78) | Pioglitazone<br>(n=70) | Total<br>(n=222) | Vitamin E<br>vs.<br>Placebo | Pioglitazone<br>vs.<br>Placebo | Vitamin E<br>vs.<br>Pioglitazone |
| <b>Change in serum enzymes and bilirubin, baseline to 96 weeks</b> |                    |                     |                        |                  |                             |                                |                                  |
| AST (U/L)                                                          | -3.8               | -21.3               | -20.4                  | -15.2            | 0.0001                      | <0.0001                        | 0.30                             |
| ALT (U/L)                                                          | -20.1              | -37.0               | -40.8                  | -32.6            | 0.001                       | <0.0001                        | 0.19                             |
| GGT (U/L)                                                          | -4.0               | -14.0               | -21.1                  | -12.9            | 0.003                       | 0.0002                         | 0.25                             |
| Alkaline phosphatase (U/L)                                         | -3.8               | -9.3                | -12.0                  | -8.3             | 0.008                       | 0.004                          | 0.87                             |
| Bilirubin - direct (mg/dL)                                         | 0.022              | 0.043               | -0.003                 | 0.022            | 0.43                        | 0.90                           | 0.38                             |
| Bilirubin - total (mg/dL)                                          | 0.064              | 0.037               | -0.040                 | 0.022            | 0.56                        | 0.07                           | 0.23                             |
| <b>Change in lipids, baseline to 96 weeks</b>                      |                    |                     |                        |                  |                             |                                |                                  |
| Triglycerides (mg/dL)                                              | -6.7               | -0.6                | -19.8                  | -8.6             | 0.45                        | 0.16                           | 0.07                             |
| Total cholesterol (mg/dL)                                          | -9.6               | -13.6               | -11.4                  | -11.6            | 0.25                        | 0.50                           | 0.51                             |
| High density lipoprotein (mg/dL)                                   | -1.9               | -0.9                | 1.1                    | -0.6             | 0.51                        | 0.008                          | 0.17                             |
| Low density lipoprotein (mg/dL)                                    | -5.8               | -12.0               | -8.1                   | -8.7             | 0.07                        | 0.26                           | 0.33                             |
| <b>Change in metabolic characteristics, baseline to 96 weeks</b>   |                    |                     |                        |                  |                             |                                |                                  |
| HOMA-IR <sup>†</sup> (mg/dL × μU/mL/405)                           | 0.4                | 0.4                 | -0.7                   | -0.2             | 0.80                        | 0.03                           | 0.02                             |
| Fasting serum glucose (mg/dL)                                      | 1.8                | 1.8                 | -3.1                   | 0.2              | 0.81                        | 0.006                          | 0.008                            |
| Fasting serum insulin (μU/mL)                                      | 1.8                | 0.6                 | -2.0                   | -1.0             | 0.76                        | 0.06                           | 0.04                             |
| Weight (kg)                                                        | 0.7                | 0.4                 | 4.7                    | 1.8              | 0.65                        | 0.0001                         | <0.0001                          |
| Body mass index (kg/m <sup>2</sup> )                               | 0.4                | 0.1                 | 1.8                    | 0.7              | 0.50                        | 0.0002                         | <0.0001                          |
| Waist circumference (cm)                                           | 0.2                | -0.4                | 3.3                    | 1.0              | 0.53                        | 0.06                           | 0.03                             |
| Waist to hip ratio                                                 | -0.0086            | -0.0086             | -0.0094                | -0.0089          | 0.76                        | 0.92                           | 1.00                             |
| Triceps skinfold (mm)                                              | 0.6                | -0.6                | 2.2                    | 0.7              | 0.21                        | 0.33                           | 0.01                             |
| Mid-upper arm circumference (cm)                                   | 0.3                | -0.2                | 1.3                    | 0.4              | 0.27                        | 0.02                           | 0.01                             |
| Trunk (% fat)                                                      | 0.5                | 0.6                 | 1.6                    | 0.9              | 0.89                        | 0.12                           | 0.12                             |
| Total (% fat)                                                      | 0.0                | 0.4                 | 2.7                    | 1.0              | 0.50                        | <0.0001                        | 0.0005                           |
| <b>Change in quality of life measures, baseline to 96 weeks</b>    |                    |                     |                        |                  |                             |                                |                                  |
| Physical component <sup>¶</sup>                                    |                    |                     |                        |                  |                             |                                |                                  |
| Physical function                                                  | -0.6               | -0.6                | -2.3                   | -1.1             | 0.95                        | 0.45                           | 0.49                             |
| Role physical                                                      | -0.5               | -0.3                | -1.6                   | -0.8             | 0.58                        | 0.85                           | 0.83                             |
| Bodily pain                                                        | -0.7               | 0.3                 | -1.4                   | -0.5             | 0.31                        | 0.98                           | 0.38                             |
| General health                                                     | 1.7                | 1.6                 | 0.8                    | 1.3              | 0.78                        | 0.59                           | 0.43                             |
| Physical component summary                                         | -0.3               | 0.4                 | -0.9                   | -0.3             | 0.45                        | 0.93                           | 0.54                             |
| Mental component <sup>¶</sup>                                      |                    |                     |                        |                  |                             |                                |                                  |
| Vitality                                                           | 0.7                | 1.2                 | -0.3                   | 0.6              | 0.33                        | 0.84                           | 0.32                             |
| Social function                                                    | -0.7               | -2.0                | -3.0                   | -1.9             | 0.62                        | 0.22                           | 0.50                             |
| Role emotional                                                     | 0.4                | -0.4                | -2.2                   | -0.7             | 0.66                        | 0.48                           | 0.81                             |
| Mental health                                                      | 0.1                | -0.5                | -1.6                   | -0.7             | 0.90                        | 0.24                           | 0.38                             |
| Mental component summary                                           | 0.4                | -0.5                | -1.9                   | -0.6             | 0.76                        | 0.23                           | 0.47                             |

\*P-values derived from ANCOVA model regressing change from baseline at 96 weeks on treatment group and baseline value of the outcome

<sup>†</sup>Four patients assigned to Vitamin E developed new onset diabetes; Their HOMA-IR values at 96 weeks were imputed with the 95<sup>th</sup> percentile value at baseline. Analyses using ranks were used due to asymmetry in the distribution of change in HOMA-IR and fasting serum insulin.

<sup>¶</sup>SF-36 standardized to 1998 US general population with mean=50 and SD=10

**Supplement Table 7. Changes in serum biochemical tests, metabolic factors, and quality of life after 96 weeks of treatment and after 120 weeks (96 weeks of treatment followed by 24 weeks off-treatment)**

|                                              | Placebo | Vitamin E | Pioglitazone | P*                    |                          |
|----------------------------------------------|---------|-----------|--------------|-----------------------|--------------------------|
|                                              |         |           |              | Vitamin E vs. Placebo | Pioglitazone vs. Placebo |
| <b>Number of paired observations</b>         |         |           |              |                       |                          |
| Baseline to 96 weeks                         | 74      | 78        | 70           |                       |                          |
| Baseline to 120 weeks                        | 68      | 71        | 63           |                       |                          |
| <b>Change in serum enzymes and bilirubin</b> |         |           |              |                       |                          |
| ALT (U/L)                                    |         |           |              |                       |                          |
| Baseline to 96 weeks                         | -20.1   | -37.0     | -40.8        | 0.001                 | <0.0001                  |
| Baseline to 120 weeks                        | -26.0   | -19.7     | -24.8        | 0.41                  | 0.58                     |
| AST (U/L)                                    |         |           |              |                       |                          |
| Baseline to 96 weeks                         | -3.8    | -21.3     | -20.4        | 0.0001                | <0.0001                  |
| Baseline to 120 weeks                        | -10.5   | -12.5     | -12.2        | 0.85                  | 0.25                     |
| GGT (U/L)                                    |         |           |              |                       |                          |
| Baseline to 96 weeks                         | -4.0    | -14.0     | -21.1        | 0.003                 | 0.0002                   |
| Baseline to 120 weeks                        | NA      | NA        | NA           |                       |                          |
| Alkaline phosphatase (U/L)                   |         |           |              |                       |                          |
| Baseline to 96 weeks                         | -3.8    | -9.3      | -12.0        | 0.008                 | 0.004                    |
| Baseline to 120 weeks                        | -4.8    | -8.3      | -4.2         | 0.05                  | 0.59                     |
| Bilirubin - total (mg/dL)                    |         |           |              |                       |                          |
| Baseline to 96 weeks                         | 0.06    | 0.04      | -0.04        | 0.56                  | 0.07                     |
| Baseline to 120 weeks                        | 0.04    | 0.09      | 0.01         | 0.53                  | 0.41                     |
| <b>Change in lipids</b>                      |         |           |              |                       |                          |
| Triglycerides (mg/dL)                        |         |           |              |                       |                          |
| Baseline to 96 weeks                         | -6.7    | -0.6      | -19.8        | 0.45                  | 0.16                     |
| Baseline to 120 weeks                        | -8.6    | 0.4       | -4.1         | 0.42                  | 0.77                     |
| Cholesterol (mg/dL)                          |         |           |              |                       |                          |
| Baseline to 96 weeks                         | -9.6    | -13.6     | -11.4        | 0.25                  | 0.50                     |
| Baseline to 120 weeks                        | -13.4   | -16.5     | -15.4        | 0.28                  | 0.42                     |
| High density lipoprotein (mg/dL)             |         |           |              |                       |                          |
| Baseline to 96 weeks                         | -1.9    | -0.9      | 1.1          | 0.51                  | 0.008                    |
| Baseline to 120 weeks                        | -1.7    | -0.9      | -2.0         | 0.61                  | 0.92                     |
| Low density lipoprotein (mg/dL)              |         |           |              |                       |                          |
| Baseline to 96 weeks                         | -5.8    | -12.0     | -8.1         | 0.07                  | 0.26                     |
| Baseline to 120 weeks                        | -10.0   | -13.3     | -11.9        | 0.16                  | 0.26                     |
| <b>Change in metabolic characteristics</b>   |         |           |              |                       |                          |
| Fasting serum glucose (mg/dL)                |         |           |              |                       |                          |
| Baseline to 96 weeks                         | 1.8     | 1.8       | -3.1         | 0.81                  | 0.006                    |
| Baseline to 120 weeks                        | 2.0     | 2.7       | 1.9          | 0.45                  | 0.66                     |
| HOMA-IR† ([mg/dL × μU/mL]/405)               |         |           |              |                       |                          |
| Baseline to 96 weeks                         | 0.4     | 0.4       | -0.7         | 0.80                  | 0.03                     |
| Baseline to 120 weeks                        | 0.1     | 0.4       | 0.2          | 0.24                  | 0.42                     |
| Weight (kg)                                  |         |           |              |                       |                          |
| Baseline to 96 weeks                         | 0.7     | 0.4       | 4.7          | 0.65                  | 0.0001                   |
| Baseline to 120 weeks                        | 0.9     | -0.4      | 3.7          | 0.21                  | 0.008                    |
| Body mass index (kg/m <sup>2</sup> )         |         |           |              |                       |                          |
| Baseline to 96 weeks                         | 0.4     | 0.1       | 1.8          | 0.50                  | 0.0002                   |

**Supplement Table 7. Changes in serum biochemical tests, metabolic factors, and quality of life after 96 weeks of treatment and after 120 weeks (96 weeks of treatment followed by 24 weeks off-treatment)**

|                                           | Placebo | Vitamin E | Pioglitazone | P*                          |                                |
|-------------------------------------------|---------|-----------|--------------|-----------------------------|--------------------------------|
|                                           |         |           |              | Vitamin E<br>vs.<br>Placebo | Pioglitazone<br>vs.<br>Placebo |
| Baseline to 120 weeks                     | 0.4     | -0.2      | 1.4          | 0.16                        | 0.006                          |
| Waist circumference (cm)                  |         |           |              |                             |                                |
| Baseline to 96 weeks                      | 0.2     | -0.4      | 3.3          | 0.53                        | 0.06                           |
| Baseline to 120 weeks                     | 1.6     | -0.6      | 2.9          | 0.05                        | 0.19                           |
| Body composition (% fat)                  |         |           |              |                             |                                |
| Baseline to 96 weeks                      | 0.0     | 0.4       | 2.7          | 0.50                        | <0.0001                        |
| Baseline to 120 weeks                     | -0.1    | 0.1       | 1.7          | 0.69                        | 0.002                          |
| <b>Change in quality of life measures</b> |         |           |              |                             |                                |
| SF-36‡ Physical component summary         |         |           |              |                             |                                |
| Baseline to 96 weeks                      | -0.3    | 0.4       | -0.9         | 0.45                        | 0.93                           |
| Baseline to 120 weeks                     | -1.3    | -0.0      | -1.0         | 0.15                        | 0.46                           |
| SF-36‡ Mental component summary           |         |           |              |                             |                                |
| Baseline to 96 weeks                      | 0.4     | -0.5      | -1.9         | 0.76                        | 0.23                           |
| Baseline to 120 weeks                     | 0.7     | 1.0       | -2.5         | 0.60                        | 0.11                           |

\*P-values derived from ANCOVA models regressing change from baseline to 96 weeks or 120 weeks on treatment group and baseline value of the outcome measure

†Four patients assigned to Vitamin E developed new onset diabetes and were not given an oral glucose tolerance test at 96 weeks or 120 weeks. Their HOMA-IR values at 96 weeks and 120 weeks were imputed with the 95<sup>th</sup> percentile value at baseline. Analyses using ranks were used due to asymmetry in the distribution of change in HOMA-IR.

‡SF-36 standardized to 1998 US general population with mean=50 and SD=10

Supplement Table 8. Sensitivity analyses

|                                                                                                 | Histologic improvement |    |           |    |              |    | P*                         |                               |                                 |
|-------------------------------------------------------------------------------------------------|------------------------|----|-----------|----|--------------|----|----------------------------|-------------------------------|---------------------------------|
|                                                                                                 | Placebo                |    | Vitamin E |    | Pioglitazone |    | Vitamin E<br>vs<br>Placebo | Pioglitazone<br>vs<br>Placebo | Vitamin E<br>vs<br>Pioglitazone |
|                                                                                                 | %                      | N  | %         | N  | %            | N  |                            |                               |                                 |
| <b>Primary outcome as stated in protocol</b>                                                    |                        |    |           |    |              |    |                            |                               |                                 |
| Missed week 96 biopsies<br>imputed as no improvement                                            | 19%                    | 83 | 43%       | 84 | 34%          | 80 | 0.001                      | 0.04                          | 0.20                            |
| <b>Sensitivity analyses</b>                                                                     |                        |    |           |    |              |    |                            |                               |                                 |
| Exclude if missed                                                                               | 22%                    | 72 | 45%       | 80 | 39%          | 70 | 0.004                      | 0.05                          | 0.38                            |
| Exclude if missed or outside time<br>window                                                     | 21%                    | 70 | 45%       | 76 | 38%          | 66 | 0.003                      | 0.04                          | 0.39                            |
| Exclude if no ballooning at baseline                                                            | 23%                    | 69 | 52%       | 69 | 47%          | 58 | 0.0004                     | 0.002                         | 0.41                            |
| Redefine ballooning component<br>to no worsening for biopsies with<br>no ballooning at baseline | 25%                    | 83 | 51%       | 84 | 48%          | 80 | 0.0007                     | 0.003                         | 0.59                            |
| Redefine ballooning component<br>and exclude if missed                                          | 29%                    | 72 | 54%       | 80 | 54%          | 70 | 0.003                      | 0.004                         | 0.98                            |
| Exclude if biopsy length < 10mm<br>at baseline or week 96                                       | 15%                    | 73 | 39%       | 69 | 30%          | 63 | 0.001                      | 0.03                          | 0.28                            |
| <b>Local reading at baseline, central reading at week 96</b>                                    |                        |    |           |    |              |    |                            |                               |                                 |
| Overall                                                                                         | 23%                    | 83 | 48%       | 84 | 52%          | 80 | 0.0008                     | <0.0001                       | 0.57                            |
| Exclude if missing                                                                              | 26%                    | 72 | 50%       | 80 | 60%          | 70 | 0.004                      | <0.0001                       | 0.23                            |
| Exclude if missing or outside time<br>window                                                    | 27%                    | 70 | 49%       | 76 | 61%          | 66 | 0.008                      | 0.0001                        | 0.13                            |

P-values determined from three pairwise Mantel-Haenszel chi-square tests stratified by clinic

**Supplement Table 9: Multiple Imputation and Best/Worst Case Scenario for missing week 96 biopsy****Number of completed and missing week 96 biopsies**

|                                     | <b>Vitamin E<br/>(n=84)</b> | <b>Placebo<br/>(n=83)</b> | <b>Pioglitazone<br/>(n=80)</b> |
|-------------------------------------|-----------------------------|---------------------------|--------------------------------|
| Completed week 96 biopsy            | 80                          | 72                        | 70                             |
| Missing week 96 biopsy              | 4                           | 11                        | 10                             |
| No ballooning on baseline biopsy*   | 2                           | 2                         | 2                              |
| Some ballooning on baseline biopsy† | 2                           | 9                         | 8                              |

\*Imputed as no response in multiple imputation and best/worst case scenario imputations

†Available for multiple imputation and best/worst case scenario imputations

**Regression analyses**

|                      | <b>Vitamin E vs. Placebo</b> |               |                | <b>Pioglitazone vs. Placebo</b> |               |                |
|----------------------|------------------------------|---------------|----------------|---------------------------------|---------------|----------------|
|                      | <b>OR*</b>                   | <b>95% CI</b> | <b>P-value</b> | <b>OR*</b>                      | <b>95% CI</b> | <b>P-value</b> |
| Per protocol†        | 3.1                          | 1.6-6.3       | 0.001          | 2.1                             | 1.0-4.3       | 0.04           |
| Multiple imputation‡ | 2.7                          | 1.2-5.9       | 0.01           | 2.1                             | 1.0-4.4       | 0.04           |
| Worst case scenario¶ | 1.7                          | 0.9-3.3       | 0.09           | 1.2                             | 0.6-2.3       | 0.62           |
| Best case scenario§  | 3.5                          | 1.7-6.9       | <0.001         | 3.3                             | 1.6-6.6       | 0.001          |

\*Odds ratio of histologic improvement estimated from logistic regression

†Observations with missing week 96 biopsy imputed as no improvement

‡Observations with missing week 96 biopsy and some ballooning at baseline were imputed using 50 datasets. Imputation model included the following variables at baseline: treatment group indicator, ballooning, inflammation, steatosis, NAFLD Activity score, and fibrosis.

¶Observations with missing week 96 biopsy and some ballooning at baseline were imputed as improvement for patients assigned to Placebo and no improvement for patients assigned to either Vitamin E or Pioglitazone

§Observations with missing week 96 biopsy and some ballooning at baseline were imputed as no improvement for patients assigned to Placebo and improvement for patients assigned to either Vitamin E or Pioglitazone

Supplement Table 10. Subgroup analyses

|                                     | Histologic improvement |    |           |    |              |    | Interaction P*             |                               |                                 |
|-------------------------------------|------------------------|----|-----------|----|--------------|----|----------------------------|-------------------------------|---------------------------------|
|                                     | Placebo                |    | Vitamin E |    | Pioglitazone |    | Vitamin E<br>vs<br>Placebo | Pioglitazone<br>vs<br>Placebo | Vitamin E<br>vs<br>Pioglitazone |
|                                     | %                      | N  | %         | N  | %            | N  |                            |                               |                                 |
| Race†                               |                        |    |           |    |              |    |                            |                               |                                 |
| White                               | 14%                    | 73 | 46%       | 67 | 32%          | 68 | 0.007                      | 0.74                          | 0.06                            |
| Non-white                           | 56%                    | 9  | 33%       | 12 | 67%          | 6  |                            |                               |                                 |
| Gender                              |                        |    |           |    |              |    |                            |                               |                                 |
| Female                              | 16%                    | 48 | 42%       | 52 | 36%          | 47 | 0.49                       | 0.22                          | 0.64                            |
| Male                                | 26%                    | 35 | 44%       | 32 | 30%          | 33 |                            |                               |                                 |
| Age at baseline - yrs               |                        |    |           |    |              |    |                            |                               |                                 |
| < 46                                | 15%                    | 47 | 43%       | 46 | 36%          | 45 | 0.41                       | 0.30                          | 0.86                            |
| ≥ 46                                | 25%                    | 36 | 42%       | 38 | 31%          | 35 |                            |                               |                                 |
| Ethnicity                           |                        |    |           |    |              |    |                            |                               |                                 |
| Non-Hispanic                        | 17%                    | 77 | 43%       | 68 | 34%          | 65 | 0.15                       | 0.13                          | 0.93                            |
| Hispanic                            | 50%                    | 6  | 44%       | 16 | 33%          | 15 |                            |                               |                                 |
| BMI at baseline - kg/m <sup>2</sup> |                        |    |           |    |              |    |                            |                               |                                 |
| < 35                                | 22%                    | 49 | 50%       | 50 | 36%          | 47 | 0.56                       | 0.92                          | 0.53                            |
| ≥ 35                                | 15%                    | 33 | 34%       | 32 | 30%          | 33 |                            |                               |                                 |
| NAS at baseline                     |                        |    |           |    |              |    |                            |                               |                                 |
| 2-4                                 | 18%                    | 39 | 23%       | 30 | 29%          | 28 | 0.04                       | 0.70                          | 0.15                            |
| 5-8                                 | 20%                    | 44 | 54%       | 54 | 37%          | 52 |                            |                               |                                 |
| Ballooning at baseline              |                        |    |           |    |              |    |                            |                               |                                 |
| None                                | 0%                     | 14 | 0%        | 15 | 0%           | 22 | NA                         | NA                            | NA                              |
| Few or many                         | 23%                    | 69 | 52%       | 69 | 47%          | 58 |                            |                               |                                 |
| Treatment adherence‡                |                        |    |           |    |              |    |                            |                               |                                 |
| < 80%                               | 27%                    | 11 | 44%       | 9  | 0%           | 8  | 0.77                       | 0.02                          | 0.09                            |
| ≥ 80%                               | 21%                    | 61 | 45%       | 71 | 44%          | 62 |                            |                               |                                 |
| Treatment adherence‡                |                        |    |           |    |              |    |                            |                               |                                 |
| < 90%                               | 30%                    | 23 | 52%       | 21 | 36%          | 22 | 0.90                       | 0.35                          | 0.46                            |
| ≥ 90%                               | 18%                    | 49 | 42%       | 59 | 40%          | 48 |                            |                               |                                 |

\*P-value determined from three pairwise logistic regressions of probability of histologic improvement on indicator variables for treatment group, risk factor, and interaction of treatment group and risk factor

†1 Placebo, 5 Vitamin E, and 6 Pioglitazone patients had missing values for race

‡Patients missing a biopsy at 96 weeks were excluded; Defined as the percent of days from randomization to biopsy at 96 weeks taking both drugs based on pill counts
